# Supplementary material
Source: PubMed Central journal article supplement (PMC3903227)
Supplement: 1314973111_pnas.201314973SI.pdf [file 1314973111_pnas.201314973SI.pdf]

# Supporting Information

Knudsen et al. 10.1073/pnas.1314973111

## Materials and Methods

**Animals.** Six- to 8-wk-old female CB6F1 (BALB/c x C57BL/6) [H-2<sup>db</sup>] or B6C3F1 (C57BL/6 x C3H) [H-2<sup>bk</sup>] mice (Harlan) were rested for 1 wk before initiation of experiments. All experiments were done according to Danish Ministry of Justice and Animal Protection Committees and in compliance with European Community Directive 86/609. Mice were housed in animal facilities at Statens Serum Institut, provided with radiation-sterilized food (Harlan) and water ad libitum, and handled in accordance with the Danish Ministry of Justice and Animal Protection Committee regulations by authorized personnel. Infected animals were housed in a biosafety level 3 facility in cages contained within laminar flow safety enclosures (Scantainer).

**Recombinant Proteins.** All DNA constructs used in this study were codon-optimized for expression in *Escherichia coli* and made by chemical synthesis followed by insertion into the pJexpress 411 vector (DNA2.0). In the five heterodimers, the single Esx proteins are connected by the thrombin-cleavable 9-mer linker GLVPRGSTG, and in the H65 fusion, the three heterodimers are in addition connected by the 20-amino acid linkers LIGAH-PRALNVVKFGGAAFL and LGFGAGRLRGLFTNPGSWRI from Rv1986. After transformation into *E. coli* BL21 AI (Invitrogen), protein expression was induced with 0.2% arabinose and the proteins purified from inclusion bodies by a three-step process, as previously described (1), resulting in a very high purity of the final products (>99%). Using the NanoOrange Protein Quantitation Kit (Invitrogen), the protein concentrations were found to be between 0.1 and 0.5 mg/mL and the yield to be between 1 and 13.5 mg purified protein from 3 L of culture. The identity of all purified proteins were confirmed by mass spectrometry analysis (matrix-assisted laser desorption/ionization-time-of-flight).

**Immunizations and Infections.** Mice were immunized s.c. in the neck or at the base of the tail three times at 2-wk intervals. Cationic adjuvant formulation 01 [CAF01, 75 µg DDA (dimethyldioctadecylammonium)/25 µg TDB (trehalose 6,6'-dibehenate)] was emulsified with 5 µg recombinant antigen to a final volume of 200 µL for each injection. Negative control mice received three equivalent doses of CAF01, and positive control mice received a single dose of  $5 \times 10^4$  CFU bacillus Calmette–Guérin Danish 1331 (Statens Serum Institut) in the first round of immunization. Ten weeks after the first immunization, the animals were challenged with *Mycobacterium tuberculosis* (*M.tb*) strain Erdman. Using a Biaera exposure system controlled by the AeroMP aerosol management system, virulent mycobacteria suspended in PBS Tween 20 (0.05%) were aerosolized and delivered via the respiratory route at ~100 CFU per mouse.

**Isolation of Cells and CFU Measurements.** Blood samples from six mice were pooled within immunization groups before peripheral blood mononuclear cells were isolated by density-gradient centrifugation, using Lympholyte Mammal (Cedar-Lane Laboratories). Splenocytes and lung mononuclear cells were isolated from individual/pooled animals by forcing cells through a 70-µm nylon cell strainer (BD Pharmingen). For CFU measurements, lung homogenates were prepared in PBS Tween 80 (0.05%) from individual mice and plated at threefold serial dilutions on Middlebrook 7H11 Bacto agar. After 3 wk of incubation at 37 °C, the CFUs were enumerated.

**Cytokine Secretion Assays.** Peripheral blood mononuclear cells, splenocytes, or lung mononuclear cells ( $2 \times 10^5$  per well) were cultured in round-bottomed 96-well plates in 200 µL complete RPMI media [RPMI 1640 supplemented with 1 mM L-glutamine, 50 µM 2-mercaptoethanol, 1% pyruvate, 1% penicillin-streptomycin, 1% HEPES, and 10% (vol/vol) FCS; Gibco Invitrogen], and 2 µg of antigen at 37 °C in a humidified incubator under 95% air, 5% CO<sub>2</sub>. Culture supernatants were harvested from lymphocyte cultures after 72 h of in vitro antigen stimulation and tested in triplicates. For detection of secreted IFN-γ, 96-well Maxisorb microtiter plates (Nunc) were coated with 1 µg/mL monoclonal rat anti-murine IFN-γ (clone R4-6A2; BD Pharmingen). Free binding sites were blocked with 2% (wt/vol) milk powder in PBS. IFN-γ was detected with a 0.1 µg/mL biotin-labeled rat anti-murine antibody (clone XMG1.2; BD Pharmingen) and 0.35 µg/mL horseradish peroxidase-conjugated streptavidin (Zymed). The enzyme reaction was developed with 3,3', 5,5'-tetramethylbenzidine, hydrogen peroxide (TMB plus; Kementec) and stopped with 0.2 M H<sub>2</sub>SO<sub>4</sub>. rIFN<sub>γ</sub> (BD Pharmingen) was used as a standard. Plates were read at 450 nm with an ELISA-reader and analyzed with KC4 3.03 Rev 4 software (BioTek).

**Flow Cytometry.** Splenocytes or lung mononuclear cells ( $2 \times 10^6$  cells per well) were stimulated in vitro in V-bottom 96-well plates at 37 °C in 200 µL complete media containing anti-CD49d (1 µg/mL) and anti-CD28 (1 µg/mL) antibodies in the presence of recombinant antigen (2 µg/mL) for 1 h, and subsequently incubated for 5–6 h in the presence of 10 µg/mL brefeldin A (Sigma-Aldrich). After overnight storage at 4 °C, cells were washed in FACS buffer (PBS containing 0.1% sodium azide and 1% FCS) and subsequently stained for 30 min at 4 °C for surface markers with mAbs, as indicated, using 1/100 dilutions of anti-CD4-allophycocyanin-Cy7 (clone GK1.5) and anti-CD44-FITC (clone IM7) (all BD Pharmingen). Cells were then washed in FACS buffer, permeabilized using the Cytotfix/Cytoperm kit (BD Pharmingen) according to the manufacturer's instructions, and stained intracellularly for 30 min at 4 °C in dilutions of 1/100, using anti-IFN-γ-PE-Cy7 (clone XMG1.2; eBioscience), anti-TNF-PE (MP6-XT22; BD Pharmingen), or anti-IL-2-allophycocyanin (clone JES6-5h4; BD Pharmingen) mAbs. Cells were subsequently washed with BD Perm/Wash buffer (BD Pharmingen), resuspended in FACS buffer, and analyzed using a FACSCanto flow cytometer (BD Pharmingen) and FlowJo software v.8.8.7 (Tree Star). The relative proportions of cells producing different combinations were determined using PESTLE and SPICE v.5.22 software.

**In Vitro and in Vivo Expression of Selected *M.tb* Genes.** We determined the gene expression profile of 13 selected *M.tb* genes in in vitro cultures and followed their in vivo expression in lungs of CB6F1 mice infected via the aerosol route with *M.tb* strain Erdman. The expression profile was determined by reverse-transcribing isolated total RNA and amplifying cDNA as previously described (2), followed by quantification in individual real-time PCR reactions. The 13 genes represented Esx substrates for all five ESX secretion systems plus antigens 85A, 85B, and 85C.

**Epitope-Binding Predictions.** The Immune Epitope Database Analysis Resources server (3), one of the most accurate prediction servers available (4), was used to perform MHC class 2



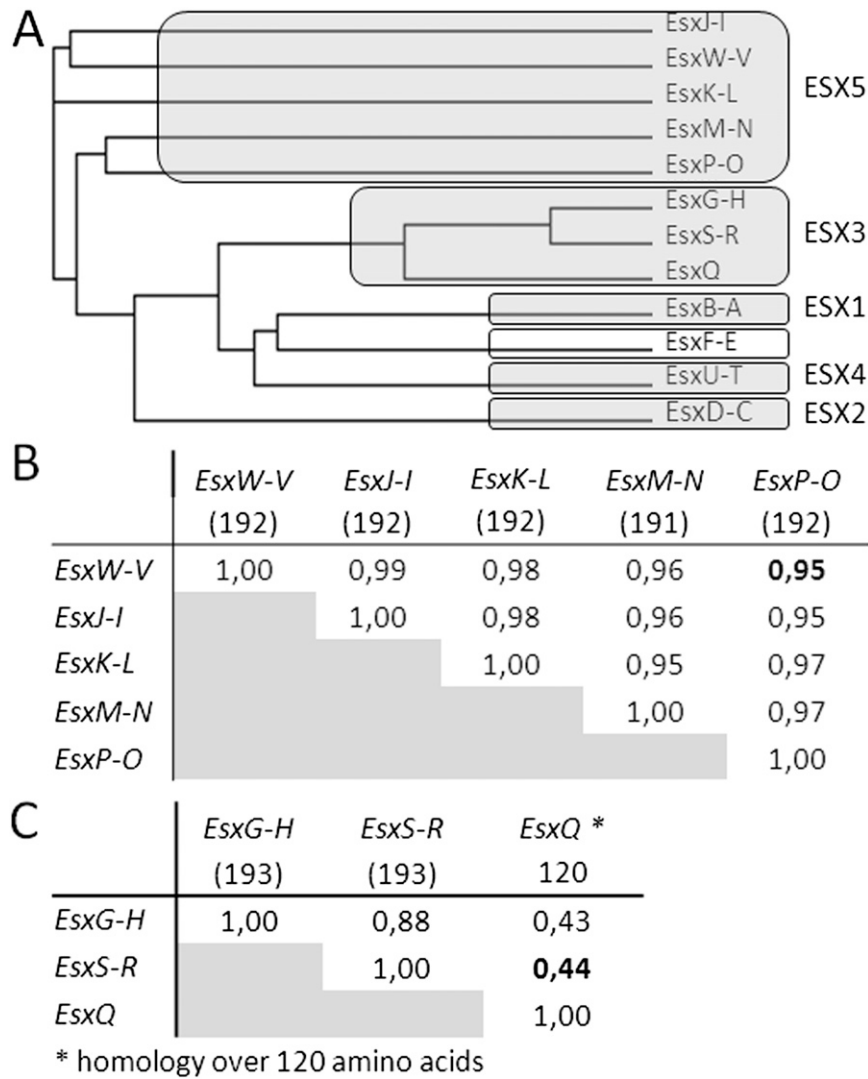

**Fig. S1.** Phylogenetic relationship among substrates for the five ESX secretion systems in *Mycobacterium tuberculosis*. (A) Cladogram based on multiple sequence alignment of ESX substrate dimers using Clustaw W2. (B) Homology among five closely related ESX5 substrates. Lowest homology is in bold. One equals 100% identity. Total amino acid number for each substrate dimer is given in parenthesis. (C) Homologs to the *esxG-H* genes and possible substrates for the ESX3 secretion system. One locus encodes only one of the proteins in the dimer substrate (*esxQ*) with modest homology to the other substrates.

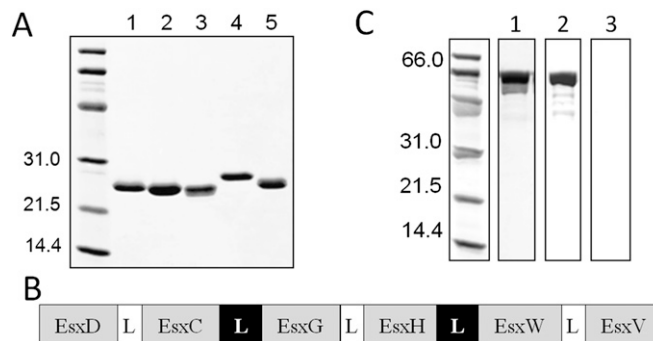

**Fig. S2.** Dimer fusions of *Esx* proteins. (A) Quality control of the purified protein dimers. Coomassie stained SDS gel. Lane 1, *EsxB-EsxA*; lane 2, *EsxD-EsxC*; lane 3, *EsxG-EsxH*; lane 4, *EsxU-EsxT*; lane 5, *EsxW-EsxV*. A molecular weight standard was included for size confirmation. All protein identities were confirmed by mass spectrometry. (B) Schematic representation of H65 showing the six subunits separated by linkers. The individual proteins in the secretion dimers are linked (L, white box) with the same nine-amino acid linker (GLVPRGSTG). The three heterodimers are connected by two nonidentical 20-amino acid-long linkers (L, black box). (C) Quality control of the purified H65 fusion protein. H65 fusion protein in SDS-PAGE gels that have been stained with Coomassie blue (1) or transferred to membranes and developed using anti-His (2) or anti-*Escherichia coli* (2) antibodies.

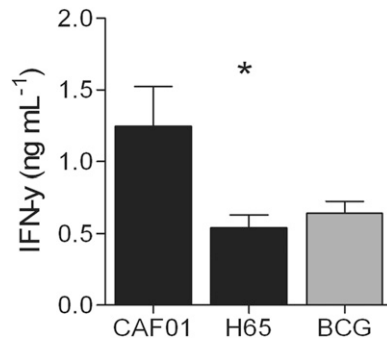

**Fig. S3.** In vivo IFN- $\gamma$  in lungs of infected mice. Groups of mice were vaccinated with H65 or bacillus Calmette–Guérin or injected with CAF01 adjuvant. Six weeks after the third vaccination, all animals were infected with *M.tb*, and after 6 wk of infection, IFN- $\gamma$  was measured by ELISA in supernatants from homogenized lungs.

**Table S1. Characteristics of the 23 ESAT-6 family proteins**

| T7S system | H37Rv*         | Protein | Common name | kDa  | pI   | Motif <sup>†</sup> | Identified in culture filtrate <sup>‡</sup> |
|------------|----------------|---------|-------------|------|------|--------------------|---------------------------------------------|
| ESX1       | <b>Rv3874</b>  | EsxB    | CFP10       | 10.8 | 4.31 | YSRAD              | Yes                                         |
| ESX1       | <b>Rv3875</b>  | EsxA    | ESAT-6      | 9.9  | 4.19 | —                  | Yes                                         |
| ESX2       | <b>Rv3890c</b> | EsxC    | ES6_11      | 9.9  | 4.17 | No                 | No                                          |
| ESX2       | <b>Rv3891c</b> | EsxD    | —           | 11.2 | 4.43 | No                 | No                                          |
| ESX3       | <b>Rv0287</b>  | EsxG    | TB9.8       | 9.8  | 6.51 | YVAAD              | Yes                                         |
| ESX3       | <b>Rv0288</b>  | EsxH    | TB10.4      | 10.4 | 4.35 | —                  | Yes                                         |
| ESX3       | Rv3017c        | EsxQ    | TB12.9      | 12.9 | 8.06 | No                 | No                                          |
| ESX3       | Rv3019c        | EsxR    | TB10.3      | 10.3 | 4.13 | —                  | No                                          |
| ESX3       | Rv3020c        | EsxS    | PE28        | 9.8  | 6.68 | YVAAD              | No                                          |
| ESX4       | <b>Rv3444c</b> | EsxT    | —           | 11.1 | 6.34 | No                 | No                                          |
| ESX4       | <b>Rv3445c</b> | EsxU    | —           | 11.4 | 6.68 | No                 | No                                          |
| ESX5       | <i>Rv1037c</i> | EsxI    | Mtb9.9D     | 9.8  | 4.48 | —                  | Yes                                         |
| ESX5       | <i>Rv1038c</i> | EsxJ    | ES6_2       | 11.0 | 5.02 | YEQQE              | Yes                                         |
| ESX5       | <i>Rv1197</i>  | EsxK    | ES6_3       | 11.0 | 5.02 | YEQQE              | Yes                                         |
| ESX5       | <i>Rv1198</i>  | EsxL    | Mtb9.9C     | 9.9  | 4.83 | —                  | Yes                                         |
| ESX5       | <i>Rv1792</i>  | EsxM    | TB11.0      | 10.9 | 5.02 | YEQQE              | Yes                                         |
| ESX5       | <i>Rv1793</i>  | EsxN    | Mtb9.9A     | 9.9  | 4.56 | —                  | Yes                                         |
| ESX5       | <i>Rv2346c</i> | EsxO    | Mtb9.9E     | 10.0 | 4.56 | —                  | Yes                                         |
| ESX5       | <i>Rv2347c</i> | EsxP    | ES6_7       | 11.0 | 5.02 | YEQQE              | No                                          |
| ESX5       | <b>Rv3619c</b> | EsxV    | ES6_1       | 9.8  | 4.48 | —                  | No                                          |
| ESX5       | <b>Rv3620c</b> | EsxW    | ES6_10      | 11.0 | 5.02 | YEQQE              | Yes                                         |
| None       | Rv3904c        | EsxE    | ES6_12      | 9.6  | 5.45 | —                  | No                                          |
| None       | Rv3905c        | EsxF    | ES6_13      | 10.5 | 4.47 | YQHNE              | No                                          |

\*Proteins used in this study are in bold.

<sup>†</sup>The amino acid pattern YXXXD/E has been identified as an ESX secretion marker present in one of the dimer partners, directing secretion of both proteins. Dash indicated a motif found in a predicted secretion partner.

<sup>‡</sup>For references, see the TubercuList Webpage (<http://tuberculist.epfl.ch/>).
